# Supplementary material
Source: PubMed Central journal article supplement (PMC2870941)
Supplement: supp_me.2009-0148_ME_09_0148_Supp_Data.pdf [file supp_me.2009-0148_ME_09_0148_Supp_Data.pdf]

**SKBR3 cells express at least 4 types of adenylyl cyclase (AC), including Ca-CaM-activated type 3 adenylyl cyclase**

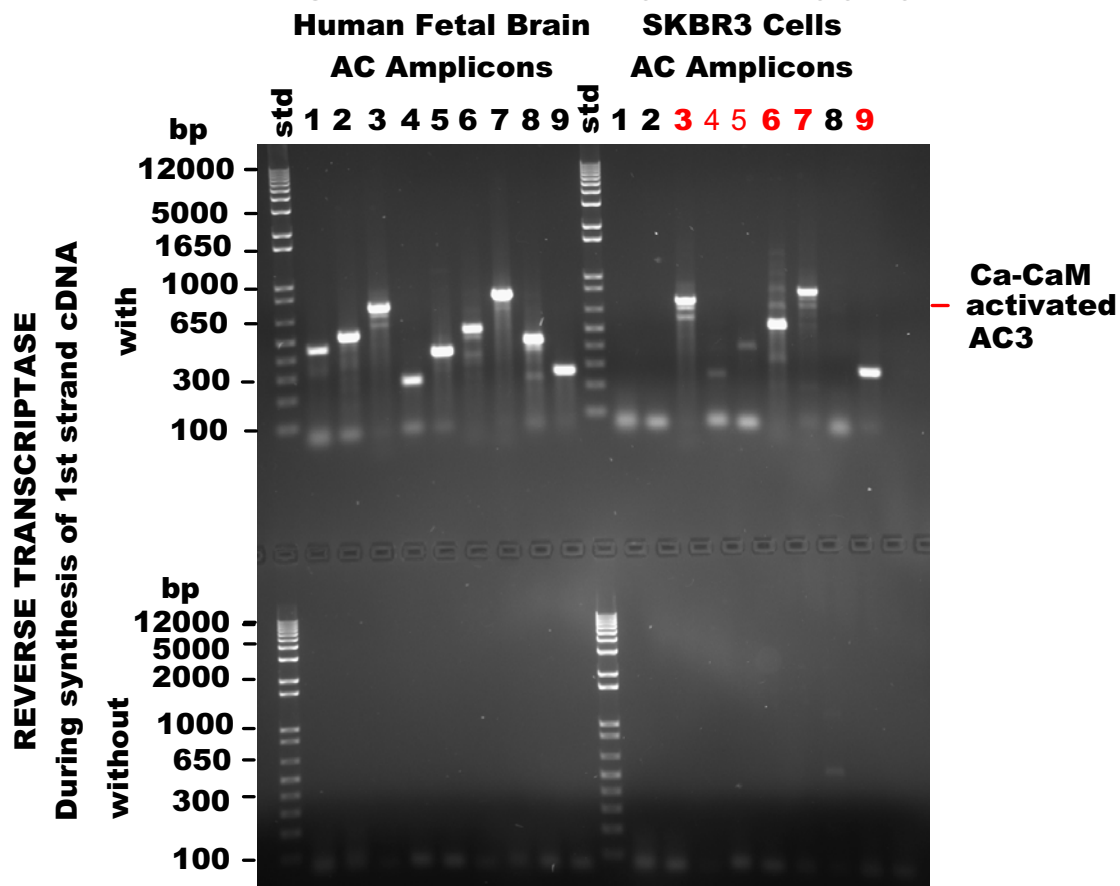

**RT-PCR analysis of control and SKBR3 cell RNA for expression of 9 types of adenylyl cyclases.**

**Properties of adenylyl cuclase subtypes have been reviewed by Sunahara, Dessauer and Gilman (1996) in Annual Review Pharmacol. Toxicol. 36:461-480**
